# Supplementary material for: Role of N6-methyladenosine Regulated lncRNAs in Prognosis, Tumor Microenvironment and Immune Checkpoints of Pancreatic Ductal Adenocarcinoma
Source: Research Square preprint supplement (doi:10.21203/rs.3.rs-1107862/v1), 2021-12-03

Table S1 The N6-methyladenosine (m6A)-related lncRNAs in TCGA and GTEx databases

TCGA: The Cancer Genome Atlas GTEx: Genotype-Tissue Expression

Figure S1: Expression differences of 23 m6A methylation regulators between PDAC tumors and normal tissues in TCGA and GTEx database (A): Expression differential heatmap of 23 m6A methylation regulators (B): Expression differential boxplot of 23 m6A methylation regulators

A and B

**A**


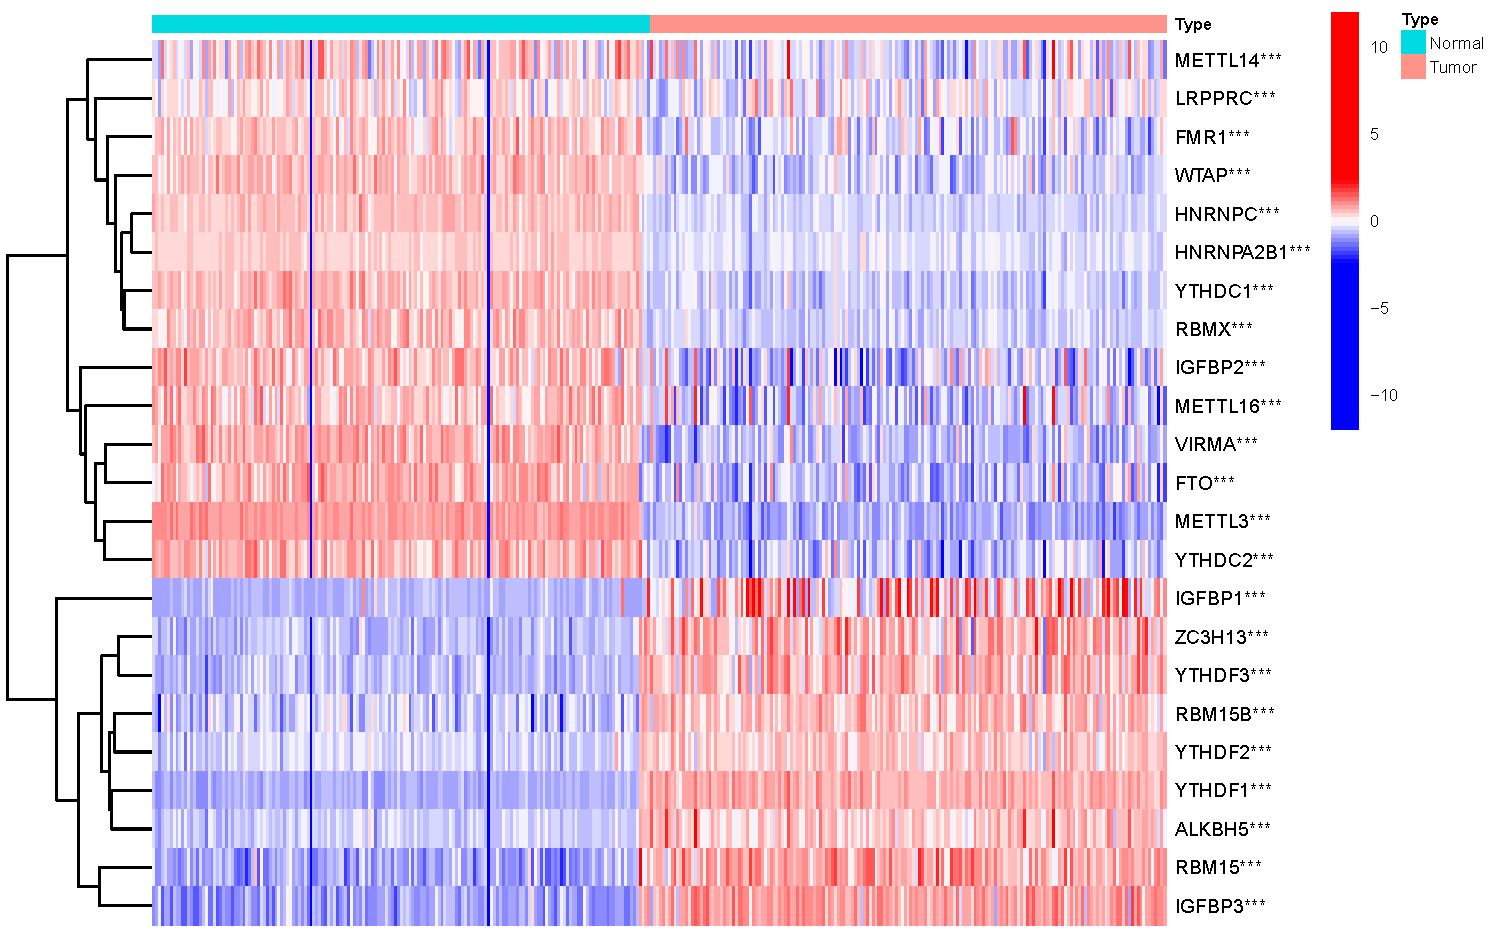


**B**


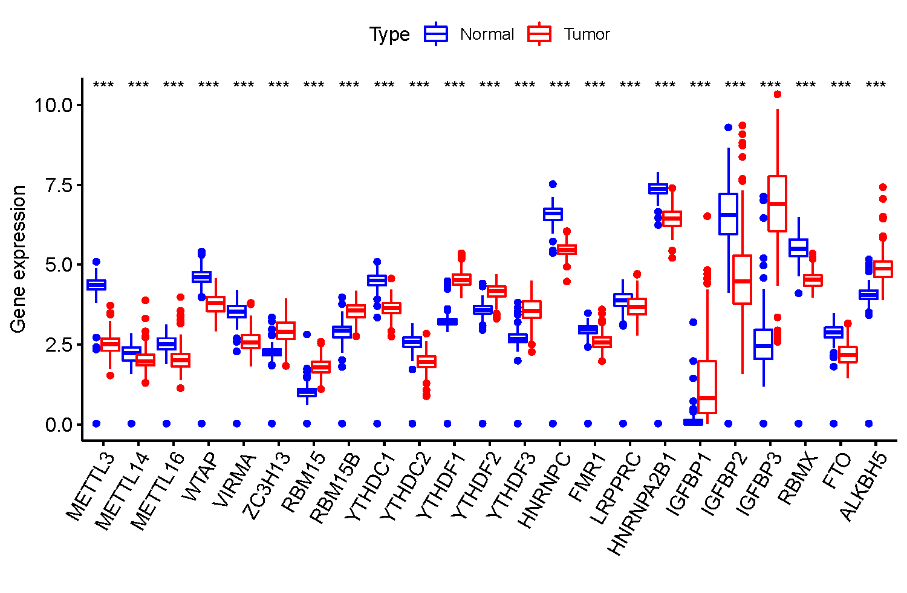


Figure S2 The change in area under the CDF curve for k = 2–9 in concordance cluster analysis.


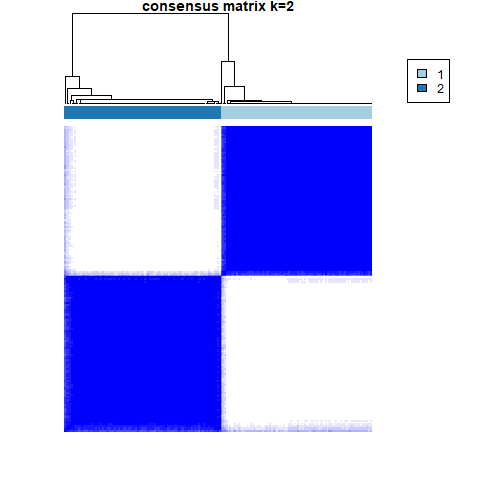

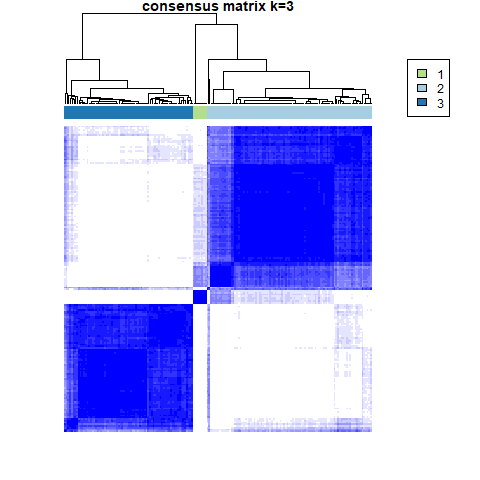

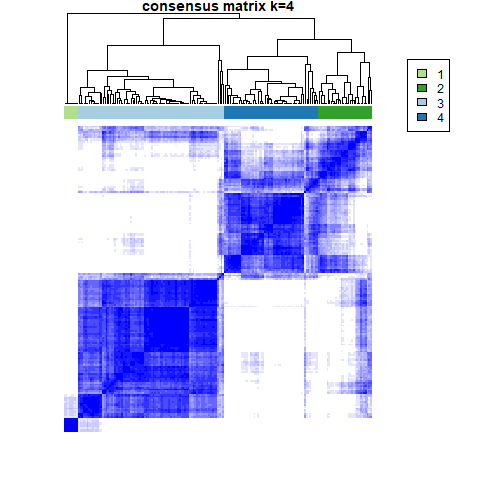

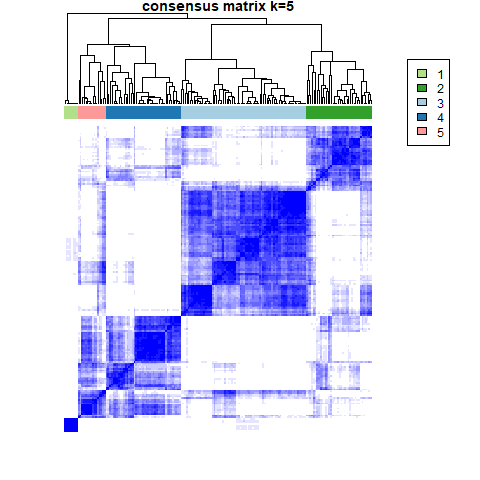

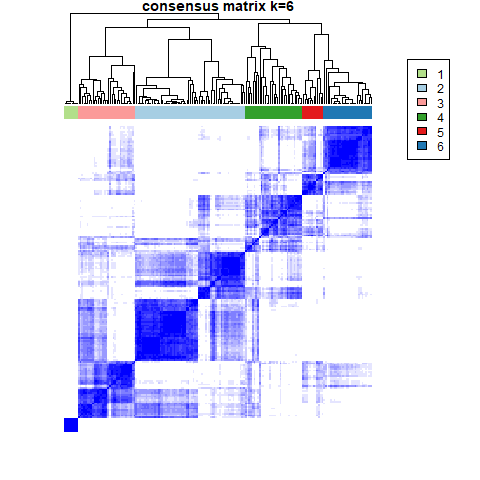

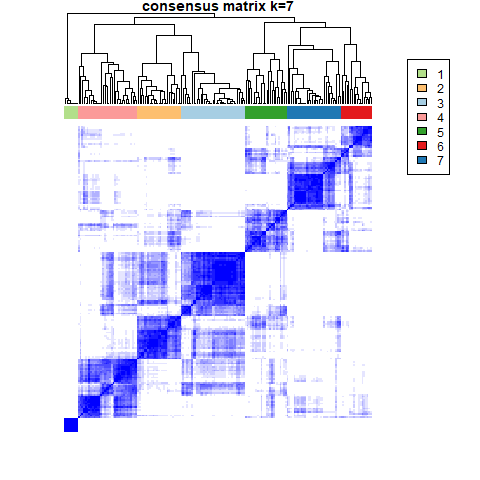


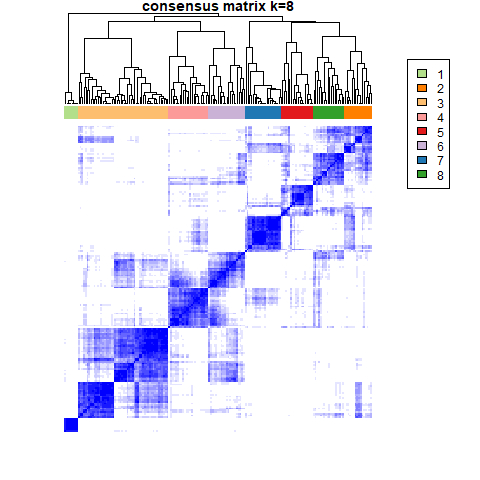

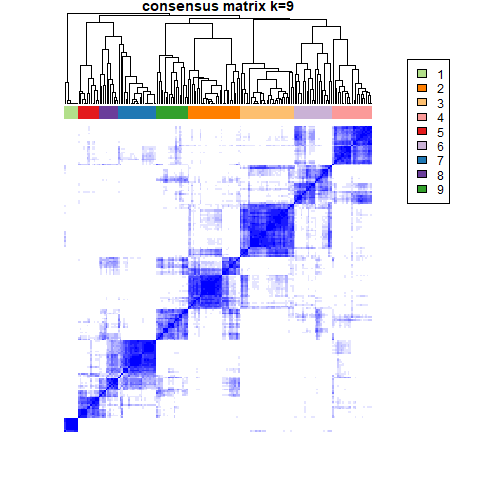


Figure S3 Plots for LASSO regression coefficients over different values of the penalty parameter.


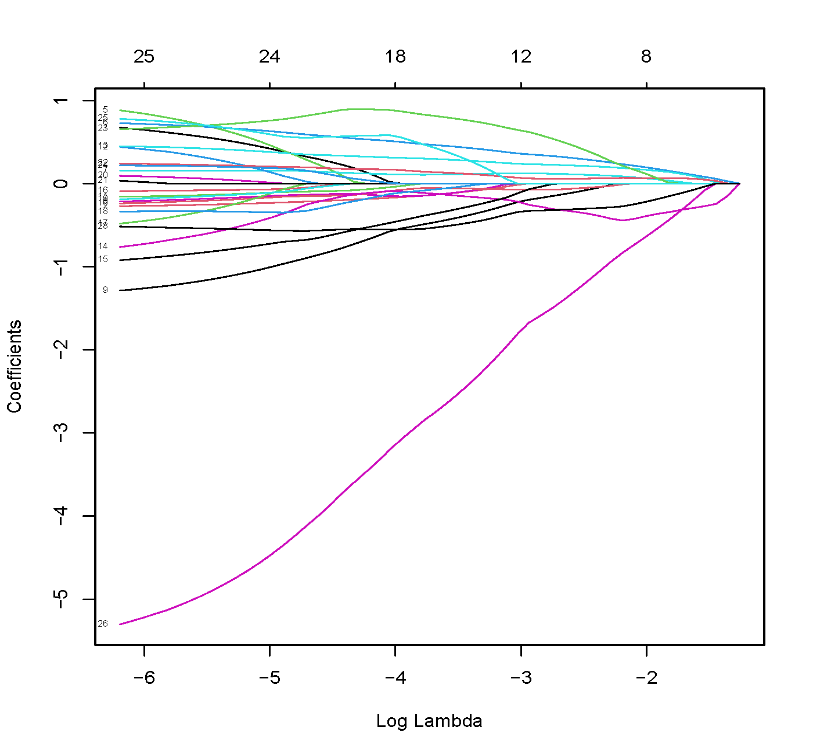


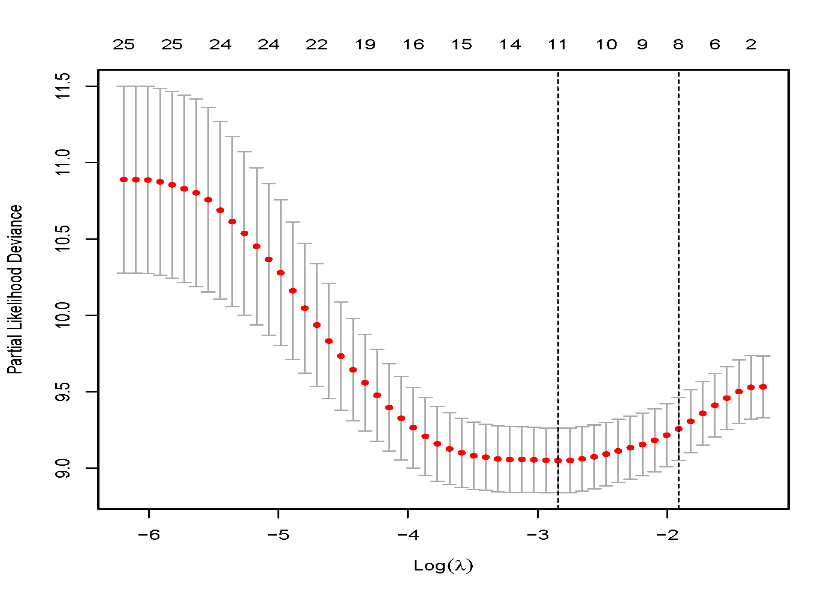

Supplement: Supplementary file 1 [file 13fe7e7309b15199ac937000.docx]
